# Supplementary material
Source: PubMed Central journal article supplement (PMC3014107)
Supplement: NIHMS146479-supplement-1.pdf [file NIHMS146479-supplement-1.pdf]

***Supplementary Information***

**The knockout of miR-143 and -145 alters smooth muscle cell maintenance and vascular homeostasis in mice: correlates with human disease.**

Leonardo Elia, Manuela Quintavalle, Jianlin Zhang, Riccardo Contu, Luca Cossu,  
Michael V. G. Latronico, Kirk L. Peterson, Ciro Indolfi, Daniele Catalucci, Ju Chen, Sara  
A. Courtneidge and Gianluigi Condorelli

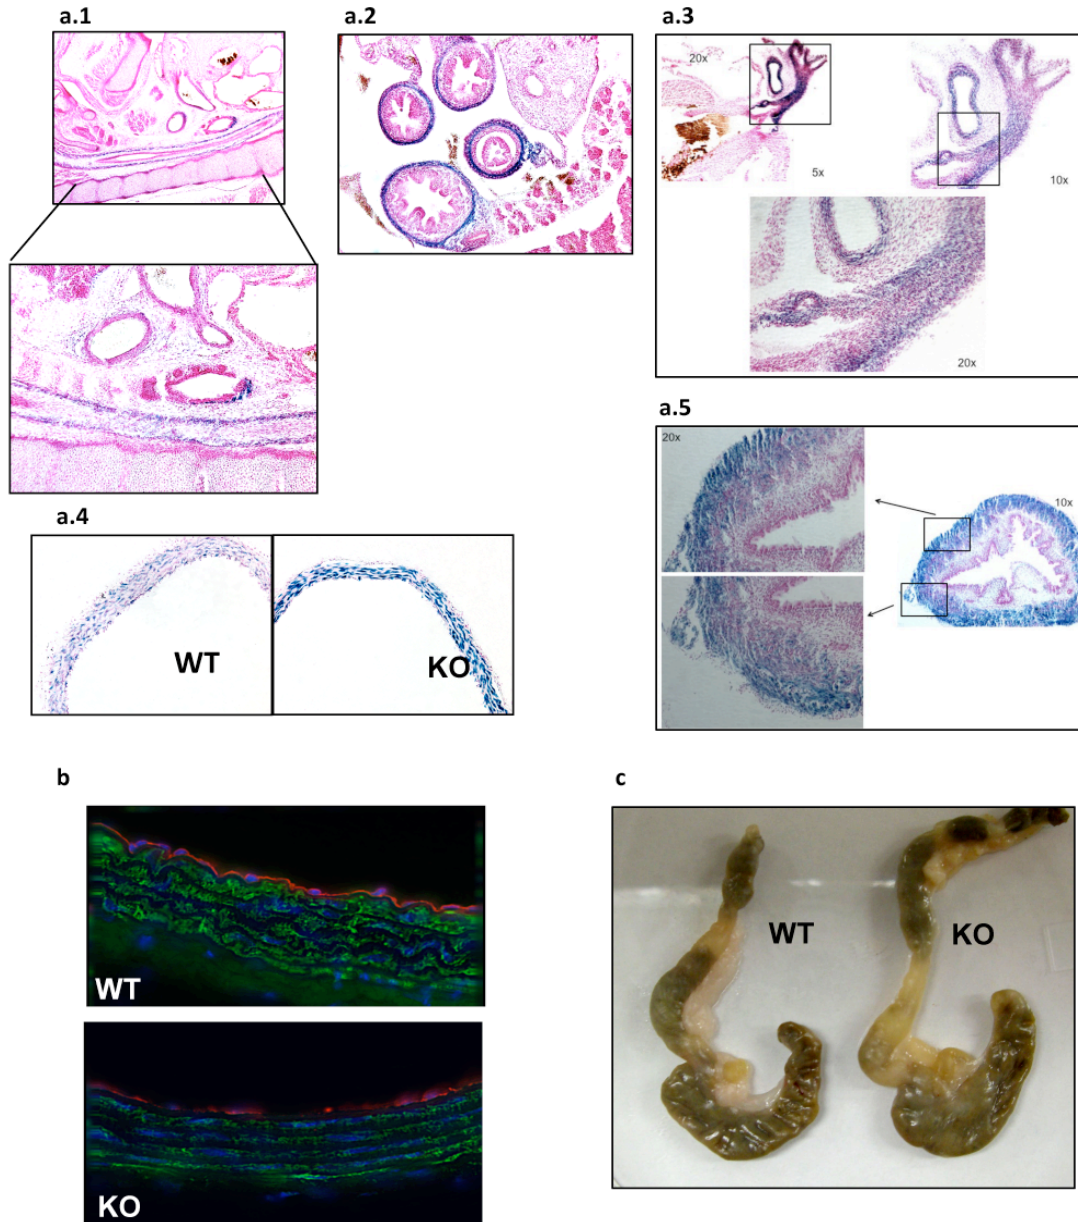

**Supplementary Figure S1. The expression of miRs 143 and 145, and the effect of their knockout.**

(a)  $\beta$ -gal staining of: Esophagus of embryo at E15.5 (a.1); Small intestine at E15.5 (a.2); Heart at P1 (a.3); Adult aorta from heterozygous and KO mice (a.4); and bladder at P1 (a.5). (b) Immunofluorescence of adult aorta stained for smooth muscle  $\alpha$ -actin (green) and Pecam (red). (c) Gross morphology of colon from WT and KO mice.
